# Supplementary material for: CMOS-Compatible Ultralow-Loss Three-Step Silicon Edge Coupler with Substrate Substitution in the Whole Communication Band
Source: MDPI journal article supplement (doi:10.3390/mi14010066), 2022-12-27

# Supplementary Material for

## CMOS-compatible ultralow-loss three-step silicon edge coupler with substrate substitution in the whole communication band

Zhen Wang<sup>1</sup>, Jin Zhang<sup>1</sup>, Lei Zhang<sup>1</sup>, Xiaoke Ruan<sup>1</sup>, Weijie Tang<sup>1</sup>, and Tao Chu<sup>1,2,\*</sup>

1 Research Institute of Intelligent Networks, Zhejiang Laboratory, Hangzhou 311100, China

2 College of Information Science and Electronic Engineering, Zhejiang University, Hangzhou 310027, China

\* Correspondence: chutao@zju.edu.cn

**Figure S1** The simulated mode profiles of TE and TM modes at positions i, ii, and iii with the final determined structural parameters.

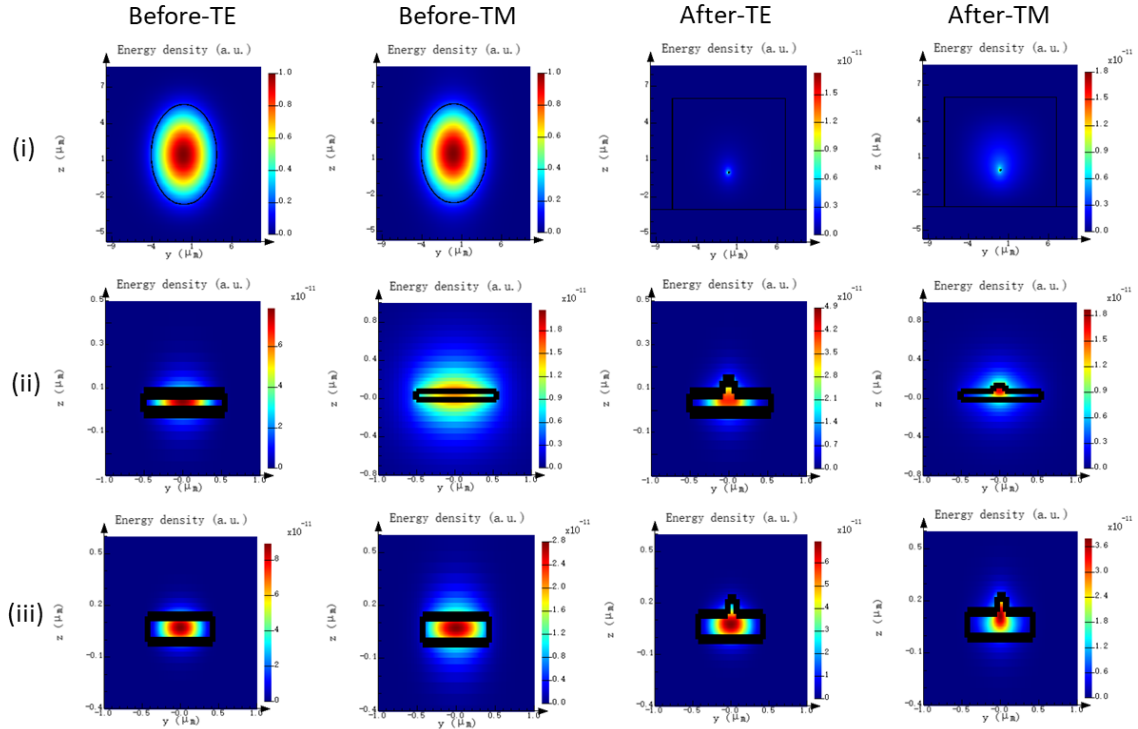

**Table S1** The simulated effective refractive indexes ( $n$ ), effective areas ( $A$ ) and TE polarization fractions ( $\eta$ ) of TE and TM modes at positions i, ii, and iii with the final determined structural parameters.

|     | Before-TE |                       |            | Before-TM |                       |            | After-TE |                       |            | After-TM |                       |            |
|-----|-----------|-----------------------|------------|-----------|-----------------------|------------|----------|-----------------------|------------|----------|-----------------------|------------|
|     | n (a.u.)  | A ( $\mu\text{m}^2$ ) | $\eta$ (%) | n (a.u.)  | A ( $\mu\text{m}^2$ ) | $\eta$ (%) | n (a.u.) | A ( $\mu\text{m}^2$ ) | $\eta$ (%) | n (a.u.) | A ( $\mu\text{m}^2$ ) | $\eta$ (%) |
| i   | 1.437532  | 60.2438               | 100        | 1.437591  | 63.8369               | 0          | 1.457583 | 21.191                | 100        | 1.456345 | 44.3238               | 0          |
| ii  | 2.185184  | 0.225246              | 100        | 1.487259  | 1.68312               | 0          | 2.266955 | 0.185257              | 99         | 1.528383 | 0.766938              | 2          |
| iii | 2.597318  | 0.163905              | 100        | 1.678703  | 0.439667              | 2          | 2.643663 | 0.158301              | 99         | 1.868711 | 0.276035              | 5          |

**Figure S2** The simulated total deformations of the (a) proposed structure without the supporting material and (b) cantilever structure under a force of 1 N on the facet, while (c) and (d) under a pressure of 10 MPa on the top surface.

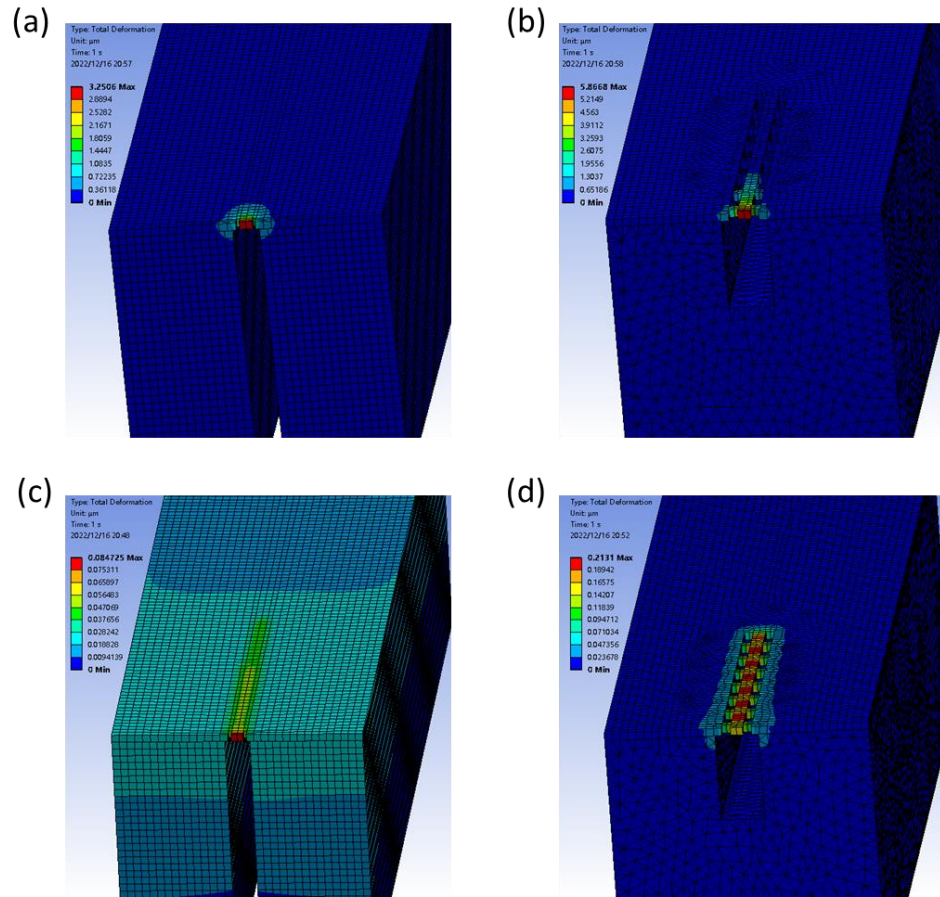

Supplement: s1 [file s1]
